# Supplementary material for: Retrogene Duplication and Expression Patterns Shaped by the Evolution of Sex Chromosomes in Malaria Mosquitoes
Source: MDPI journal article supplement (doi:10.3390/genes13060968), 2022-05-28
Supplement: s1 [file s1]

>>>AGAP000812-RA, 336 aa vs sgl library

|        | 10                                                                                                                                      | 20  | 30  | 40  | 50  | 60  | 70  | 80  | 90  | 100 |
|--------|-----------------------------------------------------------------------------------------------------------------------------------------|-----|-----|-----|-----|-----|-----|-----|-----|-----|
| AGAP00 | <u>MPLFGKSQKSQPELVKALKEAVNSLERGDKKA</u> <u>EAQEDVSKNLVL</u> IKNMLYGTSDAEPQTEIVVSQLAHEL <del>YSTNLLLLLIQN</del> LNRRIDFEGKKDVAQIFN       |     |     |     |     |     |     |     |     |     |
| AGAP01 | MPLFGKSQKSQPELVKSLKEAVNALERGDKKA <u>EAQEDVSKNLVSI</u> KNM <del>LCGT</del> ADAEPQTEIVISQLAHEL <del>YSTDLLLLLIQN</del> LNRRIDFEGKKDVAHIFN |     |     |     |     |     |     |     |     |     |
|        | 10                                                                                                                                      | 20  | 30  | 40  | 50  | 60  | 70  | 80  | 90  | 100 |
|        | 110                                                                                                                                     | 120 | 130 | 140 | 150 | 160 | 170 | 180 | 190 | 200 |
| AGAP00 | NVLR <del>RRQIG</del> TRSP <del>VEYICTK</del> PEILFTLMAGYEHQEIALNCGTMLRECARYEALAKIMLHSEFFNFFRYVEVSTFDIASDAFSTFKELLTRHKILCAEFL           |     |     |     |     |     |     |     |     |     |
| AGAP01 | NVIR <del>RQIG</del> TRLP <del>VEYICTK</del> PEILFTLMAGYEHQEIALNCGIMLRECARHEALAKIMLHSEFFNFFRYVEVSTFDIASDAFSTFKELLTRHKLLSAEFL            |     |     |     |     |     |     |     |     |     |
|        | 110                                                                                                                                     | 120 | 130 | 140 | 150 | 160 | 170 | 180 | 190 | 200 |
|        | 210                                                                                                                                     | 220 | 230 | 240 | 250 | 260 | 270 | 280 | 290 | 300 |
| AGAP00 | EQNYDKVFNHYEHLNSEN <del>YVTRRQSKLLGELLDRHNFTVMTKYIS</del> NP <del>DNLKLMMNMLKEKS</del> SRNIQFEAFHVFKVVFVANPNKPKPILDILLRNQEKLV           |     |     |     |     |     |     |     |     |     |
| AGAP01 | EQNYDKVFSRYEALLNSEN <del>YVTRRQSKLLGELLDRHNFTVMTKYIS</del> NP <del>DNLKLMMNMLKET</del> SRNIQFEAFHVFKVVFVANPNKPKPIMDILLRNQEKLV           |     |     |     |     |     |     |     |     |     |
|        | 210                                                                                                                                     | 220 | 230 | 240 | 250 | 260 | 270 | 280 | 290 | 300 |
|        | 310                                                                                                                                     | 320 | 330 |     |     |     |     |     |     |     |
| AGAP00 | D <del>FL</del> TRFHTDRSEDEQFNDEKAYLIKQIKELKPAPDQ                                                                                       |     |     |     |     |     |     |     |     |     |
| AGAP01 | D <del>FL</del> TRFHTDRSEDEQFNDEKAYLIQIKELKPQTQEAQQ                                                                                     |     |     |     |     |     |     |     |     |     |
|        | 310                                                                                                                                     | 320 | 330 |     |     |     |     |     |     |     |

| 10                                                                                                     | 20  | 30  | 40  | 50  | 60  | 70  | 80  | 90  | 100 |
|--------------------------------------------------------------------------------------------------------|-----|-----|-----|-----|-----|-----|-----|-----|-----|
| MASLLKFSAGLRAYSRSQLLFRRTKVSNAAEFRAALVNVPPTEVTTLDSGLRVASEDSGSQTATVGLNIDAGSRYENDSNNGVAHFLEHMAFKGTAKRS    |     |     |     |     |     |     |     |     |     |
| 10                                                                                                     | 20  | 30  | 40  | 50  | 60  | 70  | 80  | 90  | 100 |
| MFSLLRLANRRVRCVSHSTQQRMLGRTKVTDAAKFRTALANLPSTQVTQLDNGLRVASEDSGAETATVGVVINAGSRCENSSNNGVAHFLEHMAFKGTAKRS |     |     |     |     |     |     |     |     |     |
| 110                                                                                                    | 120 | 130 | 140 | 150 | 160 | 170 | 180 | 190 | 200 |
| QTDLELEVENMGAAHLNAYTSREQTVFYAKCLSKDVPKAVEILSDIIQHSKLGEAEIERERGVILREMQEVESNLQEVVFDHLHATAYQGTPLGNTILGPT  |     |     |     |     |     |     |     |     |     |
| QANLELEVENLGAAHLNAYTSREQTVFYAKCLSKDVPKAVEILSDIQNPTLGEEEIVRERDVIILREMQEIESNLKEVVFDHLHATAFGQTALGKSLILGPS |     |     |     |     |     |     |     |     |     |
| 110                                                                                                    | 120 | 130 | 140 | 150 | 160 | 170 | 180 | 190 | 200 |
| 210                                                                                                    | 220 | 230 | 240 | 250 | 260 | 270 | 280 | 290 | 300 |
| KNIQSIGKSDLQYYIDAHYKAPRIVLAAGGVRRHGLDVLRLAEQALGKVSSSSVDGKAALAPCRFTGSEVVRVDDSLPLAHVAIAVEGCGWTDODNVPLMV  |     |     |     |     |     |     |     |     |     |
| KNIQSIGKTELKHYIDTQYKAPRIVLAAGGVDRHKLVLQAKQNGEMNSIVDAKKDALDACRFTGSEVVRVDDSLPLAHVVIIVESCGWTDHEDHVPMLV    |     |     |     |     |     |     |     |     |     |
| 210                                                                                                    | 220 | 230 | 240 | 250 | 260 | 270 | 280 | 290 | 300 |
| 310                                                                                                    | 320 | 330 | 340 | 350 | 360 | 370 | 380 | 390 | 400 |
| ANTLIGANDRSQGGGANNASKLAMASATDGLCHSFQSFNTCYKDTGLWGIYFVCDPLKCEDMLFNVQNEWMRLCTMVTGEVERAKNLLKTNMMLQLDGT    |     |     |     |     |     |     |     |     |     |
| ATSFIGANDRAQSGSVNHASKLAVASAVDGMCHSFQSFNVCYRDTGLWGIYFVCDPLTCEDMLFNVQNEWMRLCTIVTEGEIERAKNLLKTNMMLHLDGT   |     |     |     |     |     |     |     |     |     |
| 310                                                                                                    | 320 | 330 | 340 | 350 | 360 | 370 | 380 | 390 | 400 |
| 410                                                                                                    | 420 | 430 | 440 | 450 | 460 | 470 |     |     |     |
| TPICEDIGRQMLCYNRRIPLHELEQRIDSVTAQNVRDVAMKYIFDRCPA VAAGVPVENLPDYVRIRSSMYWTRL                            |     |     |     |     |     |     |     |     |     |
| TPICEDIGRQLLCYNRRIPVHEMEQRIDSVTAAKVREVMKYIFDRCPA VAAGVPVENLPDYMRIRSSMHWTRL                             |     |     |     |     |     |     |     |     |     |
| 410                                                                                                    | 420 | 430 | 440 | 450 | 460 | 470 |     |     |     |

5. AGAP002069-PA BR32R AGAP000591-PA X 70.19 0

```

      40      50      60      70      80      90     100     110     120
GQQQQQRDLSPASGPVVNVGGGGGGGHHRAALLSAGSGGTPLVAH-----SVSGPIKRSFYTGGRNFIQPAALAPARAGVRAPVGTGALFEL
      10      20      30      40      50      60
MIPLHNQALLLSCTRIAGT-LLCHINPAGWRTPTIATVARSAIHSTASKRFLPSQVRVKPIAA--QPIGSA---L

      130     140     150     160     170     180     190     200     210     220
NQKCSATANLHPCMRGYSSVHTQQPAGPIREYNIDPYILLEDELKYIFEDIRQEISRATNHQELNKIAVYFDGQGKAFRPMVAILMAKALNYHMHNS
      70      80      90     100     110     120     130     140
QKSCSVPQHL--CTRQHETV-----DPYVLLLEGELRHIIYQDIREEIELATNHPELGRIATYYFDGQGKALRPMITILMAKAL----HSDR

      230     240     250     260     270     280     290     300     310     320
DVMNAQRQIAMISEMIHTASLVHDDVIDQSFARRGKPSVNVLWNHKKVTQAGDYILAVASMLLARLKHDEVTHILSQVLTDLVQGEFQMLGSKETENERF
      150     160     170     180     190     200     210     220     230     240
PITKGQRQIAMISEMIHTASLVHDDVIDQSFARRGKPSVNVLWNQVQVQAGDYILAVVSMMLARLOHNDVTLLILSEILADLVQELMQLDTKETENERF

      330     340     350     360     370     380     390     400     410     420
AHYFTKTYRKASLIANSKAVAVLSGADEQMAELSFQYGRNLGLAFQVDDLLDFVSSSEAMGKPAADLKLGLATAPVLFACEKFPENPMLRRFRE
      250     260     270     280     290     300     310     320     330     340
AHYFARSYRKASLIANSKAVAVLTGVGERTAEISFYGRNLGLAFQLVDDLLDFVSSSEAMGKPAAVDLKLGLATAPVLFACEQFPENAMIVRRFRG

      430     440     450     460     470     480
PGDVERAYELVHQSGLEQTRFLARKHCIEALRLASQISESPYQGLIVVGDFVLNRMK
      350     360     370     380     390     400
EGDTERAYELVHRSEGLEQTRFLARKHCAEARRLASQFDQSPYQHALVVCDVFLNRMK

```

6. AGAP004901-PA BR32L AGAP000627-PA X 56.55 7.44E-126

```

      10      20      30      40      50      60      70      80      90     100
AGAP00 MNDFIIVAGKYRIIRKIGSGSGFDIYLGINITNGEEVALKVESILARHPQLTYEYKLYKVLGGVGIPHIRYFGQERSYHVLVMDLGPSSLEDLNFCSRH
      110     120     130     140     150     160     170     180     190     200
AGAP00 FTIKTVLMLVDQMIGRLEYLHMKNFIHRDIKPDNFMIGRHCNKLFLIDFGLAKKYRDFRSRIHISYREDKNLTGTARYASINAHLGIEQSRDDMESL
      210     220     230     240     250     260     270     280     290
AGAP00 GYVMYFNRGSLPWQGLKATNKKQYKIESEKKMSTPIEVLCCKGFPFAEFAMLYNCRSLRFEEGPDYMYLRQLFRILFRTLNHQYDYTFDWTIMKQ----
      10      20      30      40      50      60      70      80      90     100
AGAP00 GYVLMYFNLOTLFWQGLKAANKRQYKIESEKKLSTPVEELCKGYPREFSLYLAYCREMDFIQRPDYCYLRKLFRITLFRHQGFVYDYVFDWNLKFGRPN

      300     310     320     330
AGAP00 ----RAMQOGSNNPPAVTSGENKREERDKDKLSSDTDE
      110     120
AGAP00 LNAFTSMKRGQSRTPSAT

```

7. AGAP006891-PA BR32L AGAP000794-PA X 89.172 0

```

      10      20      30      40      50      60      70      80      90
MAFSLVNTVAKRTAANVYVTGGGLLKNVAALCN-GQQPARSAGKWFPEQFIDQFKGPMYPDEVTSRWKLPWNNSKIAPVEKTVRN-SLNFQPHPAAH
      10      20      30      40      50      60      70      80      90
MAFCVLNAAAKRTPPTVYVVGRLQNVTAQYRLHQPARAAGKWFPEQFIEQFKGPMYPDHTVTRWKLPPWNNSKIAPVEKQVRNLKINFGPHPAAH

      110     120     130     140     150     160     170     180     190
GVLRLVLELDGETVMRADPHIGLLHRGT-KLIEYKTYTQALPYFDRLDYVSMCNEQCYSLAVEKLLNIDIPRAKYIRVLFAEITRILNHIMAVGTHAL
      110     120     130     140     150     160     170     180     190     200
GVLRLVLELDGETVMRADPHIGLLHRGTEKLEIYKTYVQALPYFDRLDYVSMCNEQCYSLAVEKLLNIEIPRAKYIRVLFAEITRILNHIMAIGTHAL

      200     210     220     230     240     250     260     270     280     290
DVGALTPFFWLFEEREKMMEFYERVSGARMHAAYIRPGGVSQDLPLGLLDDIYEFASKFGERLDEVEDVLTNRIWVQRTVDIGVVSADALNYGFSGM
      210     220     230     240     250     260     270     280     290     300
DVGALTPFFWLFEEREKMMEFYERVSGARMHAAYVRPGGVAQDIPLGLLDDIYDFAVRFGERLDEVEDVLTNRIWVQRTVNIWVTAEDALNYGFSGM

      300     310     320     330     340     350     360     370     380     390
LRSGIKWDLRKSPQYDAYDLVEFDVPIGTGDCYDRYLCRVEEMRQSLRIIDQCLNMPAGEIKTDDAKLTPPSRGEMKHSMEALIHFFKLFTQGYQVP
      310     320     330     340     350     360     370     380     390     400
LRSGIKWDLRKVPQYDAYDQMEFDVPIGTGDCYDRYLCRIEEMRQSLRIIDQCLNMPAGEIKTDDGKISPPSRTEMKQSMEALIHFFKLFTQGYQVP

      400     410     420     430     440     450     460
PGATYTAVEAPKGEFGLYVVSOGSSRPYRCKIKAPGFAHLAALDKIGRHHMLADVVAIIGTLDVVFGEIDR
      410     420     430     440     450     460     470
PGSTYTAVEAPKGEFGLYVVSOGSSRPYRCKIKAPGFAHLAALDKIGRHHMLADVVAIIGTLDVVFGEIDR

```



**AGAP00**      MSDPVARPMKFPYTFSAKLAQFPIQH YFKNQWIWRYFYIAFGVSIPLFYKIHKLANSPANQAKWAESKRKE-HEEHH  
              :  
**AGAP00** MSEEQSVSRTVKYPYTITQKIAQFPYKHYYKNQWIWRIFYISFGLSLPLFYKLHSLANVPANKEKWAESKRKKQLQPDDH

|        | 10                                                                                                     | 20  | 30  | 40  | 50  | 60  | 70  | 80  | 90  | 100 |
|--------|--------------------------------------------------------------------------------------------------------|-----|-----|-----|-----|-----|-----|-----|-----|-----|
| AGAP00 | MPGYMFINDDGGYLEGLCRGPKSGILKQADYNLNVQCTTLEDLKLHLQGTGYGQFLANEPSPLAVSVIDDKLREKLVEIFQHMNRNHAVEPLSTFLDYITYS |     |     |     |     |     |     |     |     |     |
| AGAP01 | MSGCLFNIDGGYLEALCRGPKSSILKQSDYDNLNQCTETLEDLKLQLQSTGYGFLANETSPITVSIIIDQLRETLVVFSPYSLRNQAVQVPLAEFLDYITYS |     |     |     |     |     |     |     |     |     |
|        | 10                                                                                                     | 20  | 30  | 40  | 50  | 60  | 70  | 80  | 90  | 100 |
| AGAP00 | YMIDNIILLITGTLHQRPISLEIPKCHPLGSFQMEAIIVAATPAELINAVLVDTPAPFFVDCISEQDLDEMNIIEIRNTLYKAYLEAFYDFCKNIGGT     |     |     |     |     |     |     |     |     |     |
| AGAP01 | YMIDNTILLITGMLHKRPVLVDVIAACNPLGLFQMEAINNTLAPSDLYNAILIDSPLGFFFDNCCEQDDMDLNIIEIRNTLYKTYLEKFNLYNCKEIGGA   |     |     |     |     |     |     |     |     |     |
|        | 110                                                                                                    | 120 | 130 | 140 | 150 | 160 | 170 | 180 | 190 | 200 |
| AGAP00 | TADVMCILAFEADRRRAIITINSFGTELSKDDRALKYPRCGRMNPDGLAALARADDYEQVKAVAEYAYEYAAALFDGSGGNPFGDKTLEDKFYEHEVKLNLM |     |     |     |     |     |     |     |     |     |
| AGAP01 | TANVMCILAFEADRRRAIITINALGTALPKEEYVHLYPCCGRLYPEGLLALGRASDYEQVRLVASRYAEYGLTFEDLNLDG-WSLEDKFSGYEAKLHA     |     |     |     |     |     |     |     |     |     |
|        | 210                                                                                                    | 220 | 230 | 240 | 250 | 260 | 270 | 280 | 290 | 300 |
| AGAP00 | TADVMCILAFEADRRRAIITINSFGTELSKDDRALKYPRCGRMNPDGLAALARADDYEQVKAVAEYAYEYAAALFDGSGGNPFGDKTLEDKFYEHEVKLNLM |     |     |     |     |     |     |     |     |     |
| AGAP01 | TANVMCILAFEADRRRAIITINALGTALPKEEYVHLYPCCGRLYPEGLLALGRASDYEQVRLVASRYAEYGLTFEDLNLDG-WSLEDKFSGYEAKLHA     |     |     |     |     |     |     |     |     |     |
|        | 310                                                                                                    | 320 | 330 | 340 |     |     |     |     |     |     |
| AGAP00 | YGFMQQQHFHFGVFSYSLKLKEQECRNIVWIAECVAQKHKRAKIDNIYIPIF                                                   |     |     |     |     |     |     |     |     |     |
| AGAP01 | RSFMQQQHFHFGVFSYSLKLKEQECFRNIVWIAECIVQNRKNIRNYISLL                                                     |     |     |     |     |     |     |     |     |     |
|        | 300                                                                                                    | 310 | 320 | 330 | 340 |     |     |     |     |     |

10 20 30 40 50 60 70 80 90  
 MSCNDKNGDISKEEWQSRLETFPFKQDDINKLIMNYLVTEGFKEAAEFQAESGVTPSVDLNSLDNRIQIREAVQNGFIEATHLVNQLHPPELLDNDRY  
 10 20 30 40 50 60 70 80 90 100  
 MNPTKPKPETPSVEEWNKRLOGYPPEKESLNQLIVNYFIGAGFKEADKFQIESNTTPTVNECSIDFRSRIIETIRQGNALAMDVDSFAPGLAESDRW  
 100 110 120 130 140 150 160 170 180 190  
 LYFHLQQLHLIELIRAGKIEEALTFAQTISEAGESNPEVLNELERTLALLAF----ETPQHSPFADLLGHSHRQKVASELNAAILKMEQQEQSSPRMI  
 110 120 130 140 150 160 170 180 190 200  
 MVFRLQQLQLIELIRAGSVEDALHYAQTVRWECPGRTQQVASEIERTMTLLLTLPQTRGTDPSSSFSTLLEQQHRDQVARTVNEALLLWDNRELPSARME  
 200 210 220  
 NILKLILWAQTELDKKNVKYPKMDLASATIEPK  
 HLFKLILWAQAELEKRMVQFSKLNMAEATFEVE  
 210 220 230

10 20 30 40 50 60 70 80 90 100  
 MVRISVLADALKCINNAEKRGRQVLIRPNSKVVIKFLTVMMKHEGYIGFEFIVDDHRSKGVVNVLTGRNLNKAIGIISPRFDVALNDIERWTNNLLPSRQFG  
 ::::::::::::::::::::::::::::::::::::::::::::::::::::::::::::::::::::::::::::::::::::::::::::::::::::::::::::::::::::::  
 MVRISVLADALKCINNAEKRGRQVLIRPNSKVVIRFLTVMMKHEGYIGFEFIVDDHRSKGVVNVLTGRNLNKAIGIISPRFDTKVTDLERWTNNLLPSRQFG  
 10 20 30 40 50 60 70 80 90 100  
 110 120 130  
 YVVLTTSGGIMDHEEARRKHLGGKILGYFF  
 ::::::::::::::::::::::::::::::::::::::::::::::::::::::::::::::::::::::::::::::::::::::::::::::::::::::::::::::::::::::  
 YVVLTTSGGIMDHEEARRKHLGGKILGYFF  
 110 120 130

10 20 30 40 50  
 MAAWRAAGLN~~YINYSNIAARLLRKALKPELRAQAVRRDDSHIKFTKWQNGKPEKAITE~~  
 .....  
 MAAWRAAGLN~~YINYSNIAARMVRKALKPALRADAARREESHIMTKWKD~~GKSEKSATEA  
 10 20 30 40 50



13. AGAP001701-PA BR82R AGAP000852-PA X 91.209 3.02E-58

```

      10      20      30      40      50      60      70      80
MADEKK---GSESEHINLKVLGQDNVAVQFKIKRHTPLRKLMNAYCDRAGLSMQVVRFRFDGQPINENDPTTLDMEEGDTIEVYQQQTGGF
.....
MADDDKDPKSSSESEHINLKVLGQDNVAVQFKIKKHTPLRKLMNAYCDRAGLSLQVVRFRFDGQPINENDPTTLEMEEGDTIEVYQQQTGGGNRSNQ
      10      20      30      40      50      60      70      80      90

```

14. AGAP005558-PA BR72L AGAP000935-PA X 67.789 0

```

      10      20      30      40      50      60      70      80      90     100
MASLLKFSAGLRAYSRSHQLFRRTKVSNAAEFRAALVNVPTEVTTLDSGLRVASEDSGSQTATVGLWIDAGSRVENDSNNGVAHFLEHMAFKGTAKRS
.....
MASLLKLSTAVR---RQMLLAGSRAGSSYAAAFRSALSNEPATEVTTLDSGLRVASESVPSQVATVGLFIDAGSRVEDKHSNGTANFFEHAFKGTAKRS
      10      20      30      40      50      60      70      80      90

      110     120     130     140     150     160     170     180     190
QTDLEVENMGAHLNAYTSREQTVFYAKCLSKDVPKAVEILSDIIQHSKLGAEIERERGVILREMQEVES-NLQEVVFDHLHATAYQGTPLGNTILGP
.....
QSALEQEVESMGAQLDASTGRDQTSFTARCLSKDVPKLEILADVQNPRLDDADVKKAREVILGEIEQVDAGNLRVVDHLHSTAFQGTSLSNVTWVGP
100      110      120      130      140      150      160      170      180      190

00      210     220     230     240     250     260     270     280     290
TKNIQSIGKSDLQYIDAHYKAPRIVLAAGGVRHGDVLRLAEQALGVSSSSVDGKAAALAPCRFTGSEVRVRDDSLPLAHVAIAVEGCGWTQDQNVPLM
.....
SSNIRSIKADDVRGYVNSHYKAPRMVLAAGDVRQAELEKLAEKHLGKIESTFDGKAPQLSPVRFSGSEMRVRDDSLPLAYVAVAVEGCGVSDSDAMALS
200      210      220      230      240      250      260      270      280      290

00      310     320     330     340     350     360     370     380     390
VANTLIGAWDRSQGGGANNASKLAMASATDGLCHSFQSFNTCYKDTGLWGIYFVCDPLKCEDMLFNVQNEWMRLCTMVTGEVERAKNLLKTNMLQLDQG
.....
VASALIGIWDRTFGGGVNNASKLAVASAHDKLCHNFESFNLTYYRDTGLWGIYFECDFLMCEDMLFNVQNEWMRLCTMVTGEVERAKRQLKTRLLAQLEG
300      310      320      330      340      350      360      370      380      390

00      410     420     430     440     450     460     470
TTPICEDIGRQMLCYNRRIPLHELEQRIDSVTAQNVRDVAMKYIFDRCPAVAAGVPVENLPDYVRIRSSMYWTRL
.....
PHAICEDIGRQVLALGRREPLHDVERRIENVTAQNVRDVAMRYIFDRCPAVAAGVPVENLPDYMIRSSMYWTRL
400      410      420      430      440      450      460      470

```

15. AGAP012315-PA BR73L AGAP001198-PA 2R 32.911 2.00E-27

```

      10      20      30      40      50      60      70      80
MKRLAFIIPALIALGHSIRPPIIEGTEANLHEFPYQVSLQWNFNNGSRARHFCSGSIINQRWILTAACHCLEEYTKDGWFEVVAGVNN
.....
GEIVLVKAICTRALPASFSASTNPISFADIKPDVANGGDAAENSFPYMQIQ-QFMVVSIVHH-CGGTLVTSRCILTAACHAVESLK---LRAIAGTVW
      20      30      40      50      60      70      80      90     100

      90      100     110     120     130     140     150     160     170     180
IAHEEAGAQRNRVTRYEQHESY--DLSAIRYDIGVLQLSHPLDLTRNIKTMLATKDTLIHQIAKFAGWGSISKTWEDIYDPDKLMKVNLIIRTEEDCQT
.....
RDSETLG-QRRPIVRLLAHESYVQDGTTPYDIALALVEEPFVVDGRAIAVIALMPDYDPPGVMDVLGFGKIDH--DDTLPDRLRVVECLRHVEDCQK
110      120      130      140      150      160      170      180      190      200

      190     200     210     220     230     240     250     260
IGKIDETQICAGGYKNVSGCTADSGGPLTVTIDGEMQIGVLSYGEKPCQARLPYVSSVMYFHDWIQDAIKED
.....
--HPSEGLTLCVGN-PGATACQDGGPVPVGRIDGSDWLGVVVSFGMKSCGTG-PIICTDVHLYREWIGQRVFD
      210     220     230     240     250     260     270

```

16. AGAP011630-PA BR73L AGAP003713-PA 2R 58.252 2.76E-38

```

      10      20      30      40      50      60      70      80      90
AGAP00 MKGLAVVAVLLFACLVASQSNNYFWGVDRDPRDVLNRTIAVRSGTILQVKSIDLVPYPLKGQVGRNISAIISVVDQYTNKGKGYASLYAGGIGYNYTT
.....
AGAP01 MKFATVFPVVLA AVLGA CMVTAQT HNYPFGSRIPYDSL VNQT TVIQSSSFLRVKSAYLDYPLKGQRGRNITAIYVYDRLGSGRGGYASITSGGIGKNYTR
      10      20      30      40      50      60      70      80      90     100

      100     110
AGAP00 VHLSQRGHGYNFIVEIYGR
.....
AGAP01 INLKTQRGNGMNFQVEIYGR
      110     120

```

17. AGAP009948-PA BR83R AGAP006895-PA 2L 97.581 5.37E-87

```

      10      20      30      40      50      60      70      80      90     100
AGAP00 MATMAHPGHGPGSRMQGPPLTPWSPDKKHSRDRMWCIYPAYINRKKSRQEGRRIPKQCCVDDPSPQEIRDVLQALNMNVLVELKQYPRERSRELQCR
AGAP00      M Q G S P P L T P W S P D K K H S R D R E W V C I Y P A Y I N R K K S R Q E G R R I P K Q Y C V D D P S P Q E I R D V L Q A L N M N V L V E L K Q Y P R E R S R E L Q C R
      10      20      30      40      50      60      70      80
AGAP00      110      120      130      140      150      160
AGAP00 GRIRVQLRNDGAPLNSEYATRDSILLHLGKTIPLLSRQAKPQEQSOAAASSAGQKKGKGR
AGAP00 GRIRVQLRNDGAPLNSEYATRDSVLLHLGKTIPLLSRQAKPQEQSOAAASSAGQKKGKGR
      90      100      110      120      130      140      150

```

18. AGAP011515-PA BR83L AGAP001676-PA 2R 98.67 0

```

      10      20      30      40      50      60      70      80      90     100
AGAP00 MCDDDAGALVVDNGSGMCKAGFAGDDAPRAVFPISVGRPRHQGVVMGMGNKDAYVGDEAQSKRGILTLYPIEHGIITNWDMEKIWHHTFYNELRVAPE
AGAP01 MCDDDAGALVIDNGSGMCKAGFAGDDAPRAVFPISVGRPRHQGVVMGMGNKDAYVGDEAQSKRGILTLYPIEHGIITNWDMEKIWHHTFYNELRVAPE
      10      20      30      40      50      60      70      80      90     100
AGAP00      110      120      130      140      150      160      170      180      190     200
AGAP00 EHPVLLTEAPLNPKSNREKMTQIMFETFAAPAVYVAIQAVLSLYASGRITGVVLDSDGVSHTVPIYEGYALPHAILRMDLAGRDLTDYLMKILTERGYS
AGAP01 EHPVLLTEAPLNPKSNREKMTQIMFETFAAPAVYVAIQAVLSLYASGRITGVVLDSDGVSHTVPIYEGYALPHAILRMDLAGRDLTDYLMKILTERGYS
      110      120      130      140      150      160      170      180      190     200
AGAP00      210      220      230      240      250      260      270      280      290     300
AGAP00 FTTTAREIVRDIKEKLCYVALDFEQEMQAAAASSSEKSYELPDGQVITIGNERFRAPEALFQPSFLGMESTGIHETVYNSIMRCDVDIRKDLANSVL
AGAP01 FTTTAREIVRDIKEKLCYVALDFEQEMQAAAASSSEKSYELPDGQVITIGNERFRAPEALFQPSFLGMESTGIHETVYNSIMRCDVDIRKDLANSVL
      210      220      230      240      250      260      270      280      290     300
AGAP00      310      320      330      340      350      360      370
AGAP00 SGGTMYPGIADRMQKEITSLAPSTIKIKIAPPKYSVWIGGSILASLSTFQTMWISKHEYDEGGPGIVHRKCF
AGAP01 SGGTMYPGIADRMQKEITSLAPSTIKIKIAPPKYSVWIGGSILASLSTFQSMWISKHEYDEGGPGIVHRKCF
      310      320      330      340      350      360      370

```

19. AGAP003091-PA BR82R AGAP008667-PB 3R 33.333 3.98E-14

```

      590      600      610      620      630      640      650      660      670     680
VVETSTEVLSGAYVDFQIVIKPNMTAAVDLQSDAVFAGIKDRVAENEAKAKAINAVFLYKITSGGKVAKEWVLDLKNKAVYEGPVQGGGKADTTMTIAD
      . . . . . : : : : : . . . . . : : : : : . . . . . : : : : : . . . . . : : : : : . . . . . : : : : :
      M A L K S D P V F E R I A K R L E S I D P N N R Q V Q V Y K F R I Q Q N G T V V K T W V L D L K A V K L T E G D - - - G P A E A T L T M E D
      10      20      30      40      50      60
AGAP00      690      700      710      720
AGAP00 GDMIELALGKLQPTAFMKGKLLKIAGNIMLAQKLAPLLKTEAKL
      . . . . . : : : : : . . . . . : : : : : . . . . . : : : : : . . . . . : : : : :
      D I M F A L G T G A M P A K E A L A Q D K L D V E G Q V E L I F L L E P F I A S L K K
      70      80      90      100      110

```

20. AGAP007107-PA BR82L AGAP010239-PA 3R 59.942 3.99E-145

```

      10      20      30      40      50      60
MGKDYKTLGIPRGSTEDIKKAYRKLALKYHPDKNKSPGAEEKFKEVAEAYEVLSDKKK
      . . . . . : : : : : . . . . . : : : : : . . . . . : : : : : . . . . . : : : : :
MGKDFYKILGVSKNASDDEIKKAYRKLALKYHPDKNKAPQAEERFKEVAEAYEVLSDKKK
      10      20      30      40      50      60
AGAP00      70      80      90      100      110
AGAP00 REMYDKFGEGLKGRASN--GTSNSSQNFYEFHGDPRATFAQFFGSNNPFGSFFDMHND
      . . . . . : : : : : . . . . . : : : : : . . . . . : : : : : . . . . . : : : : :
RDIIYDQYGEGLKGGAGGMPGAGGQSGQFYNFHGDPRATFAQFFGTSDFFSVFFGTG
      70      80      90      100      110      120
AGAP00      120      130      140      150      160      170
AGAP00 -SLFNSSIFNDDFFFTPFSGLGNRHGL--GGAFRSHSFNVH--SPLKKEKVQDPPIEHDLY
      . . . . . : : : : : . . . . . : : : : : . . . . . : : : : : . . . . . : : : : :
GNIFHQEM--DGDFFG--FDGRGGSVGGFPGGAFRSQSFNHGSQPKQKLQDPPIEHDLY
      130      140      150      160      170
AGAP00      180      190      200      210      220      230
AGAP00 VTLEIYHGCVKMKISRRVLQPDGTSKKEDKCVSISIKPGWKSQTKVTFQKEGDQTKGK
      . . . . . : : : : : . . . . . : : : : : . . . . . : : : : : . . . . . : : : : :
VSLDVNAGCQKKMKISKVMGQDGSARKEEKILSINVKPGWKAGTKITFPREGDQIPGK
      180      190      200      210      220      230
AGAP00      240      250      260      270      280      290
AGAP00 IPADIVFIIRDKPHVWFRRGSDLYTARLTALKQALCGVIFEVPTMTGEKLRISTKQEI
      . . . . . : : : : : . . . . . : : : : : . . . . . : : : : : . . . . . : : : : :
VPADIVFIIRDKPHAFKREGSDIKYTAKISLRQALCGTVVKVPTLSGETLTISTAGEVV
      240      250      260      270      280      290
AGAP00      300      310      320      330      340
AGAP00 KPNTVKRIQGYGLFFPKEPSRKGDLLVAFDIKFPDKLSTSEKEMLDMLPNS
      . . . . . : : : : : . . . . . : : : : : . . . . . : : : : : . . . . . : : : : :
KPHTVKRLQNRGLFFPKEPSRRGDLVAFDIRFPDQVSPSTKEILADLFMDVA
      300      310      320      330      340      350

```

10 20 30 40 50 60 70 80 90 100  
MAPSRKNKVVKEEVQVSLGPQVRDGEVVFVGAHIYASFNDTFVHVTDLSGKETISRVTTGGMKVKADRDEASPYAAMLAADVAEKCKSLGITALHIKLR  
 .....  
 MAPSRKNKVAKEEVQVSLGPQVRDGEVVFVGAHIYASFNDTFVHVTDLSGKETISRVTTGGMKVKADRDEASPYAAMLAADVAEKCKSLGITALHIKLR  
 10 20 30 40 50 60 70 80 90 100  
  
 110 120 130 140 150  
TGGNRTKTPGGAQSALRALARSSMKIGRIEDVTPIPSDSTRKGGRRGRRL  
 .....  
 TGGNRTKTPGGAQSALRALARSSMKIGRIEDVTPIPSDSTRKGGRRGRRL  
 110 120 130 140 150

[illegible][illegible]

MSNKKLKPEEPVEEVNEFSVEKILDSRVVNGKVYFLKWKGYSSEENTWPEENLDCDDLIQAFKESR-----KKKEAKEE  
MGRTEPKPNTNGNSGNDSDTEEEYVVVEIKIVDRREKRGKVYLLWKVGYSGSNSWEPRENLDCPELIKAFEQSRTDAAKKDGAAGKKRTTTKKKRTTGG  
SSG-----RKSKLKDSSEEPKAVPAKRKATSDKKVGFDRGLIPEETIIIGATDEHGKLMFLMKWKNAANADLVPAEQANVKCPQIVIKF  
SENDNDGSGDDEGRDDNASTKSNSKSNDDGGDPKQADGE--AVEELNGFEKGVVPEKILGATEGDNELLFLIQWKDKDKAQLVKSKEARKHCPQLVIDF  
YESRLTWQSAEAKNDTRDD  
YEERLIWQTVDQSQVD



25. AGAP007024-PA BR92L AGAP000498-PA X 93.846 6.87E-92

```

      10      20      30      40      50      60      70      80      90     100
AGAP00 MALNPQYEEIGKGFVTQYYALFDDSTQRPRTLVLNLYNAELSFMTFEGQIQGAAKILEKLQSLTFQNIKRVLTAVDSQPMFDGGVLINVLGRLQCDDPPH
      10      20      30      40      50      60      70      80      90     100
AGAP00 MAINPQYEEIGKGFVTQYYALFDDSTQRPRLVLNLYNAELSFMTFEGQIQGAAKILEKLQSLTFQNIKRVLTAVDSQPMFDGGVLINVLGRLQCDDPPH

      110     120     130
AGAP00 AYSQTFVLKPIGASFFCAHDIFRLNIHNTA
      110     120     130
AGAP00 AYSQTFVLKPLGGTFFCAHDIFRLNIHNSA
      110     120     130

```

26. AGAP010182-PA BR93R AGAP000200-PA X 44.146 1.44E-163

```

      10      20      30      40      50      60      70      80
      MSLHEWYRRRERGLPARIGDTDMYRTIFRSLOPRALSAELSHPYRCGODSGAICNLEFSPDGTLLAAACEYKSIVLFDPLAEKOVSAV
      10      20      30      40      50      60      70      80      90     100
MQTSGSTSNKFMPIHQWCGRRERGLGPRFGDADTIHRTIYRSLEPKKIWNDPGRFPGIVRDYGGAFNLEFSPDGTLLVAACQKKSIVLFDPLTEIQICAV

      90     100     110     120     130     140     150     160     170     180
      SNAHDGSVNCIKFVDSRTFASCSDDTTVALWDARNLSTKLRTLHGHSGWVKNEYAKGAGVLLSSGLDGLVYAWELNNSTEQGCTYQRLLYMPGLMRCRL
      90     100     110     120     130     140     150     160     170     180
      KNAHTECVNCIKFIDHQIFATCSDTTVALWDIRNLTKLRTLNGHSGWVKNEYSKRDRMLSSGFDGSVYGWEINNYTEYGSVYRRVLTSLGRLSRL

      110     120     130     140     150     160     170     180     190     200
      APDESRLVLCTGTGYLMLVHDLASLAGDLVDFRPNIQRLNLMRKQRPVLGARKTPAVSHRRKRNRIEFVSDFPFGDDAEMISGLTLHPQGWICALSRNI
      110     120     130     140     150     160     170     180     190     200
      SPDESRLVLSMSSGYLIIHDLDLANLAGDLEGFYPNVYRLMQVGRQLIPMAARFRHLFYSKRKKNRIELVDFPPNNNPEMISSLAHPQGWCTLTRNV

      210     220     230     240     250     260     270     280     290     300
      SYDEKTEWSVVHDIQWSSENEDESDETEKQEPDELNTEDSQEPEQEDVPQQERSNCTRSMEGFGRDPK-----REPSETV
      210     220     230     240     250     260     270     280     290     300
      SSDEMTEWSVVHDIQ-----ELPHDEESDEDEELAEREQNREEDNDQAEESS--NSGVNVARDPQPGTSGMSGRSARGSELGGMFRLNVTMREMMSSV

      310     320     330     340     350     360     370     380     390
      LT--EATWCNGATERNVINNAFPHSGAPCPRLAEVPLQPTIRLSPP--AKGGRAGSAWSEPVASK-----RTAGHSTDGTGT----
      310     320     330     340     350     360     370     380     390
      ESHREPTVGSNEANANAEGNVDPQPSGSRNLV-----TSRSPPHEAQHVEAGPSGQPPAANVRRQNGRRVMITRRNLRSENASTDVWATEVTF

      400     410     420     430     440     450     460     470     480
      -----RLLYYIQESNKVEGYMREACFSPDGRVICSPHDDYGVRLLAFAQNEQCNEMR
      400     410     420     430     440     450     460     470     480
      RERKNMPSQVRRNRRQIYGVSGVSSASTGYTGAGRKRAKICKKNVPRMLYMQETITDQGFIRESCFSPDGRICSPHD-HGFRLLAFNENCNELQ

      490     500     510     520     530     540     550     560     570     580
      YARQCLASGSEAPLRELRYKPCYPHVVISQFSRPFLLVTGCLLGNVWVNLPLVS
      490     500     510     520     530     540     550     560     570     580
      HATG-IWRNEKAQQLHEVKRKQCHSSLVSSQFSRPFLLVTGCLLGIKIVWHQPALY

      590     600     610     620     630     640

```

27. AGAP011362-PA BR93L AGAP028592-PA X 36.334 1.67E-58

```

      10      20      30      40      50      60      70      80
      MPPKNKKCSICGTNSTVRWIIILSRKTLCDGICYDVQCNPPLEPRQEDGPD-----EPVAGPSGLGRKSETILATGPVQSNPADDGIFLKPTFI
      10      20      30      40      50      60      70      80      90
      MSPKVQRCISICGTLETARWYLLDRRSICSDCHDVQLNPPLDPREERSPEPENRPQQYEDLMEQDASNASAVQHSSERALLECPVTPKKVD---VLQPSTE

      90     100     110     120     130     140     150     160     170     180
      PPRPAKIARVNSATLDGATTSSGS---SSSSTTTTNTTATSATHSSSRSTTPSKPASRNKARKSFPSKP--KLTDKTRKPSVPKFVHNDYWYEVGDIV
      90     100     110     120     130     140     150     160     170     180
      GQADLELGADGFGVGMDEQEELHDSVPPVGMFSPRRLRRRVCPVTRVPARRGT-KKNGRTTKSRRALTKKQPTKAPRETASTRTVSKVLQDNVWYVQGDIV

      100     110     120     130     140     150     160     170     180     190
      SLVDTKDKTYIAQIRGLVVDVFNEKNAILTWLVPTTASPNNPNEGFDPATYHIGPDEDKMRNLSEMFVHMHAPSGYYLNRSDPYPRQNVTPG---VERDGR
      100     110     120     130     140     150     160     170     180     190
      SMLDTKDNTYIAQIRGLIVDAYNEKSAVLTWLLPSTVSPPPNEGFDPATYHIGPDEAPRRLTYMHFVHMNAPVNYFLDRNEPYRPECYGSNTTQCDNR

      200     210     220     230     240     250     260     270     280     290
      STEPPLYDWANICQLHLGERPVSK
      200     210     220     230     240     250     260     270     280     290
      N-----YVWATMGR
      300

```

28. AGAP009660-PA BR93R AGAP007722-PA 2L 41.27 2.41E-41

```

      10      20      30      40      50      60      70      80      90     100
MAPNAAELKVKPASDSTGINAILLGPFGSGKGTQAPLLKEKYCVCHLSTGDMLEIAISGSKLGAQLKKVMDEGKLVSDLEVVDMIDSNLDKPECRNGFL
      10      20      30      40      50      60      70      80
MASGKLFRAIIMGAPGSGKGTVSGRIVKAFSLKHISSGDLRLANIEKRTGLIADKYIREGKLPDIYITKLCILSELEQIRS-HSWL

      110     120     130     140     150     160     170     180     190     200
LDGFPRTVVQAEKLDNLEKRNTGLDAVIEFGIDDSLLVRRITGRLIHQASGRSYHEEFAPPKVPMRDETGEPLMRSSDDNAQALVKRLESYHRQTKPL
      110     120     130     140     150     160     170     180
LDGFPRTREQADDLWN--QER---IDSVINLDVPFEVIERIQSRWVHLPGRVYVNGFNDPKTPGRDDVTGEPLSQRPDDTPVAVRKRLEVDYDACTRPI
      90      100      110      120      130      140      150      160      170      180

      210     220     230     240
ADYYALRGLHFRVDAAKSASDVANIDSIFTKQRAHRLGF
      190      200      210
NEYFDKKGVLVTFKGSTTDEIWPVHRKYLEAKIQ
      190      200      210

```

29. AGAP009701-PA BR93R AGAP006997-PA 2L 33.266 6.37E-156

```

      10      20      30      40      50      60      70      80      90     100
SRVLSRHQLVRQPTNQVRYVSVGRAGPSSLEIRRFIDYFTVKHNHRLIRSSSLIPFNDSTIAFVNAGMNQFKSVFLGTAERPCQ----RAVNSQKCVR
      10      20      30      40      50      60      70
MDTSLTASQIRSFIDFFKEKE-HLYVHSSSVIPLDDPTLLFANAGMNQFKPIFLGTVDPNSDMAKVVRTANTQKCIR

      110     120     130     140     150     160     170     180     190     200
VGGKHNDLSVVGTDSDYHHTFFEMLGWNSFGDYFKREACEMAWDLLRNVYRIDTRVYVTFGGDAKLNLPADDECRQIWRSLGIPPERVLFPFGARDNFWF
      110     120     130     140     150     160     170
AGGKHNDLDDVGKDVYHHTFFEMLGWNSFGDYFKKEICTWAWELLTERLKLPERLYVTYFGGHPESGLEPDLECREIWLKLVKEEHILPGSMKDNFWF
      80      90      100      110      120      130      140      150      160      170

      210     220     230     240     250     260     270     280     290     300
MGNSGPCGPCTEIHLDSGEYRNTKARQHLVNAGVPDLTEIWNIVFIQYNRSLLDGTIRNLPQRHVDVTGMGLERLVAHLQHKQSNYDIDLFEPIFRRIQK
      180     190     200     210     220     230     240     250     260     270
MGETGPCPCSELHFDRIIGG---RSVPVLNMDDPDVLEIWNLVFIQYNRE-QDSSLKLLPKKHIDCGMGFERLVSVIQDKRSNYDIDVFMPLFDAIQK

      310     320     330     340     350     360     370     380     390
ATKKEPYRGSFLSTDSDHYELDTAYRIMADHSRMITACLADGMFPS---QNHKLRRRIIRKSLALATRTFN-HPQLLRETVPVCVEILSTVYPEMGRNLPV
      280     290     300     310     320     330     340     350     360     370
GTGAAAYQGRVGADSDS-GVDMAYRVLADHARTITIALADGGFPDNTGRGYVLRRLRRAVRYATEKLNAPKGFATLVDTTVQLLGTFPEVRKDPQHI

      400     410     420     430     440     450     460     470     480     490
LQII-EHEQHLYSALRTRKSAETSALLQQFPQLEESEALEHPGLADAIKELAQTPTLNAGAIHKLVDYGLDEELLVKLGEMMHFSLDFRDYERYVR-
      380     390     400     410     420     430     440
KNVINEEEEQFLKTLTRGRNL-----LNRTIAKLGNSKV--IPGDVAWRLYDTYGFPIDLTLLMAEEKQMTIDMEGEEKAKHE

      500     510     520     530     540     550     560     570     580
--VLKDGHKHELATKLQTRL SAYENLRESLDSATLKPTRAERRYNYAFNADK---GTYEVA PCRARVSLLL-----EDEARDQWHIVTDQSNFYCES
      450     460     470     480     490     500     510     520     530     540
SYIISQGEKSKTATIDLDVHGISELQERKVPAT-----DDSKYRYKAESIDPLAQYVFEPTGKIVALRFNNAFVEEVQAGQECGVILDRNTFYAES

      590     600     610     620     630     640     650     660     670     680
GGQSDTGRLTVEAGGSAGGQTFEVTGVTDHNGFVMHSIKRQPNVALSVGDTVVQLQVDANRRQTLLHHTATHLLNAVVRKVVALPMCQRSSSVSERHFR
      550     560     570     580     590     600     610     620     630
GGQIQDQGFVKNVDESS---EFNVSLVYNRGGYVLHIGVVEGT--LRVGDEVHCHMDVVRRLTMKNHSATHALNHSLLKVLGQDQDQGSVLVPEKLR

```

30. AGAP011054-PA BR93L AGAP007543-PA 2L 66.845 1.03E-93

```

      40      50      60      70      80      90      100     110     120     130
GSCHSFGGGHVYPQEAPRFVDHKLQYTKAVISRPAPAFEATAVVDGAFKKIKLSDYRGKYL VFFYPLDFTFVCPTEILAFSDRVNEFKKLNAEVIAASI
      10      20      30      40      50      60      70
MPVPELQKPAPAFSGTAVVNGEFKEIRLSYDLGKYVVLFFYPLDFTFVCPTEIVAFSDRADEFHEKKCQVIA CST

      140     150     160     170     180     190     200     210     220     230
DSHFTHLAWINTPRKEGGLGKINIPLVSDITHSISKDYGVFLDDLGHTRLGLFTIDDRGVLRQITMNDLPVGRSVDETLLRLVQAEQYTDKHGEVCPAGWK
      80      90      100      110      120      130      140      150      160      170
DSHFTHLAWINTPRKQGLGELKIPLLADKSMKIARDYGVLQEEESGVPPFRGLFIIDDKGNLRQVTVNDLPVGRSVDETLLRLVEAFRYTDEFGVEVCPANWK

      240     250
PGODTIVPNPEEKIKYFEKNH
      180      190
PGSKTMVADPHKSKDYFNAVN
      180      190

```

31. AGAP008909-PA BR93R AGAP012962-PA 2R 61.783 1.81E-71

```

      10      20      30      40      50      60      70
      MSDFVRDMRNHKIVPDVVPVPPESELLHVTYPGGLRVNLGNILTPTEVKHVPEVWPEAEFDPAYVALVLTDPDAPSRTAP
      : .....: .....: .....: .....: .....: .....: .....:
MSICRLQTRASSIFTTSIRLFSSAIKSMKEHEVVDPVVPVAPAEVAKVTYPSGAVVSEGNVLTPTQVKDVPKVEW-NADSGALYTLCTMDPDAPSKEP
      10      20      30      40      50      60      70      80      90
80      90      100     110     120     130     140     150     160     170
      KPREWHHWLVVNIPGMDLAKGDTLSDYIGAAPPRTKGLHRYVFLLYRQNERIYYKESRLSNRSTQGRGKFSTHKFSEKYELGLPVAGNFFQAQFDDYVPK
      : .....: .....: .....: .....: .....: .....: .....:
      TYREWHHWLVGNIPGADVAQGETLSAYVSGSPPGGTGLHRYVFLVYKQNGKLTDFEPRLTNTSADNRGGFAIRKFAEKYQLGNPVAGNFYQAEWDDYVPL
00      110     120     130     140     150     160     170     180     190

80      190
      LYRQLGHFQNAF
      : .....:
      LYKOLGA
```

32. AGAP009076-PA BR93R AGAP002370-PA 2R 33.697 1.85E-109

```

      10      20      30      40      50      60
      MLPKVPLPTVEQTMAEYVRVLQPIVTPQQLERTKSIKQFSAT--IGPSLQEYLQAKREADDNWAYYYWLN
      : .....: .....: .....: .....: .....: .....:
SPAANASGKMCPTSQQNYATAAAGGAGPLALQRQVPVKLADTMQKLVRSEIPHDGDTLAGTKRAVEKFTVPGGIGQKLQSLLEQRAAQKDNWLADWWLR
      30      40      50      60      70      80      90      100     110     120

70      80      90      100     110     120     130     140     150     160
      DMYMDNPLPLPINSNPGMVMPPRKFTTVNDLAQFAAQIDQLMDHKEMLEGGGLKQERATSREKGQPLCMAQYYRLLGSCRPPGDPDRDS-QYLPPEGGEQT
      : .....: .....: .....: .....: .....: .....: .....:
      CAYMEYRDPVIYVSSPGLVFPFRASYKTLDLQYAAKMVSAALAYKMLIDGGKIKPEMMGK---VPLDMSQYEKIFGTCRIPGKERDSVQYNP-----R
130     140     150     160     170     180     190     200     210

170     180     190     200     210     220     230     240     250     260
      DAHVIVCCRRMYCVPVKAGDRGRNLNENELAAQLLHILNEAPGLPETEATVGILTTEPRPKWATDRELLLEEQNARNIELIETALVVMCIDDEPIPSYN
      : .....: .....: .....: .....: .....: .....: .....:
      SRHIVVACNNHYRLPVFTAAGGIVSERQILAEKKIAAKEGN--SRAAPLGILTANHRDSWAQAYETLMADATNRASVESIQQALFVLSIDRELPOKQ-
220     230     240     250     260     270     280     290     300     310

270     280     290     300     310     320     330     340     350     360
      ARGFNGSPAGAHYAGGRDESINMAHEM-IHGGGSACNTANRWFDKTMQLIICNDGTWGLCYEHSPEGIAVVQLLEGILKRIDEAATAKDGPATADRLQ
      : .....: .....: .....: .....: .....: .....: .....:
      -----GTDHIVTASDLLIHGGGSAANGGNRWYDKTIQLVVAPNGINGLTYEHSPEAGQPIAVMTDFLLEYIGS-----GKCLNTMDQAE
      320     330     340     350     360     370     380     390

370     380     390     400     410     420     430     440     450     460
      LQQSHLPPPERLEWIVRPEIERRLREAARSVDKRIEDLDFYVYRYKPYGKNFIKACQVSPDVIYIQLALQLAYYKLYGHLVSTYESASTRRFLLGRVDCIR
      : .....: .....: .....: .....: .....: .....: .....:
      LSAGAV---KLDFNVTPALRSEIDQAAGFVDKLAADIQMDYLHFTDYGKDFIKTQRMSPDSYIQMAIQYAFYRLHHVPGAHYESAQNRMYLHGRTETIR
      400     410     420     430     440     450     460     470     480

470     480     490     500     510     520     530     540     550     560
      SASLEALEWAKAMCQGEANVTLESDEDDYSAAAGDVKKKDHLRELFRCAAAARQTEVMVQNILGYGIDIHLLGLREACREREGILHELFTDECYKIAN
      : .....: .....: .....: .....: .....: .....: .....:
      SCSVESVAFARAM-----LEPKRDGRSKLEA-----MKAAINAHKAYVSMAIQGYGVDRHLLGLKLTAKENGLALPELYADQGLQKSA
490     500     510     520     530     540     550     560

570     580     590     600     610     620     630
      CPLLSTSQVACSTNSFMGYGPVTPHGYGASYNPHNEIIFCLSAFFTSDKTSASRFARSLQDSDLAMRDLLS
      : .....: .....: .....: .....: .....: .....: .....:
      HMRLSTSQVASRYDAFCYGPLTQDGYGCCYNPKEDDMWFGVSAFRSKDLDLARFRVSLQEALREMYEVLVVYGEKPKGKL
570     580     590     600     610     620     630     640
```



[illegible][illegible]

10 20 30 40 50 60 70 80 90  
 MRIGATIPNFQADSTKGPIDFYEWIGDSWCVLFSHPADFTPVCCTELGRIAVHQBHEFKRNVKVLAVHSVDDLKCHVDVWVNDIKSYCPDIIGN-FPYPI  
 10 20 30 40 50 60 70 80 90 100  
 MSLNLGDPPNFNTADTTIGPIDFHQWIGDGWAILFSHPADYTPVCCTELAAVAKLVPEFTKRNVKPIALSCDTVESHRGWIEDIKAYGQLAAADPPFPPI  
 100 110 120 130 140 150 160 170 180 190  
 IADPSRD LAVRFGMLDEKDKDNVELAQTVRALFIISPDKRVRRLTMHYPTSTGRNVDEIRVIDSLQLTDRCLKVIATPANWTPTGKVMILPSVSEEDADKL  
 110 120 130 140 150 160 170 180 190  
 IDDSKRELAVKLNMLDRDEIGSAGLPLTCRAVFVIDAGKKRLRSILYPATTGRNFAEILRTIDSIQLTDKRRV-ATPADWMPGDSCMVQOPTVPADQLATL  
 200 210 220  
 FPNGIERSMPSGNVYVRTTIDYE  
 200 210 220  
 FPAGVDSVTLPSGKQYLRKTECPN

## 36.AGAP001384-PA BR92R AGAP008039-PA 3R 51.576 6.95E-130

10 20 30 40 50 60 70 80 90  
MKQESSHKFSAGSDYHQTL SRLKTEFEKRYNDQKQASIASL TEYEILRTL GSGAFGT VKLIRKASGEYFAMKILSKERIVYQKQLQHTTNEKRILQ  
MGNNATSANKKVDAAESVREFLDQAKEDFEKWK - RNPTNTAALDDFERIKTLGTGSGFRVMIVQHKSTKDYAMKILDQKQVVKLKQVEHTLNEKRILQ  
100 110 120 130 140 150 160 170 180 190  
SIRFPFVVNLEICYKDNSYLYL VMPFVNGGEMFTLLRHSRRFSEAQAIFYGAQVALALEYLHGCNLIYRDLKPENLLVDYRGYVKMTDFGFCCLKDRTW  
AISFPFLVSLKFHKDNSLYMVL EYVPGGEMFSLRKVGRFSEPHSRFYAAQIVLAFEYLHYLDLIYRDLKPENLLIDSQYGLKVTDFGFAKRVKGRTW  
200 210 220 230 240 250 260 270 280 290  
TLCGTPEYL APEITQAKGYKSDWWSYGVLLYEMAAGYSPFYVNSSDOMVL FERTCKGKYKPKSFSTDLCSLVHLLLOTDL SRRYGNLRNGCDDTIKOH  
TLCGTPEYL APEILSKGYNAVDWWALGVLYEMAAGYPFFADQPIQ -- IYEKIVSGKVRFP SHFGSELKDLLRNLLQVDTLKRYGNLKAGVNDIKGH  
300 310 320 330 340 350  
AWFKTINWYGLNREL PAPYVPKLGPGDASLFDVYDEQKLKIASKCLYAKEFADF  
RWFASTDWIAVFQKRIEAPFIPRCKGPGDTSNFDDEETLRISSTEKCAKEFAEF

## 37.AGAP003106-PA BR92R AGAP009791-PA 3R 40.287 0

170 180 190 200 210 220 230 240 250 260  
ISGCSADFPAGCGVDESRRSSNICLTDECVRTASSLAA -- MDRTADPCKDFFQFACGWNKMHVIPEDRSSISTFEVLADQQQATLKGVLEE ---  
TATEKAVERSEQLSRVRRSGVMNDDRSPESVRAAQVAIMKQYMDPADPCDDFYQYACGNWDRVNP IPKDKAALDTFELLRESLDLVLKQLLEGEPA  
200 210 220 230 240 250 260 270 280 290  
-----  
270  
----- PVNKEDNRATK ----- KAKAF  
GLLDVENALSTVRSQPDGTTKSTSTTTTAASAGWPTT VTGPAQQLHRVRKRGRAENRNRSGRAVQNKLIIRSAQVKVRVRKRELLINDDAEMKARHL  
300 310 320 330 340 350 360 370 380 390  
280 290 300 310 320 330 340 350 360 370  
YKSCMNLEQIRLLDVQALRSLKKGWVPIEKN - WTPSTSIIEHLLGKLTGEYDEPGLVELYVGADDKNSSMMIIQVDQLLALPSRDYLLKESSEGDM  
FVSCMNYELIERRGLEPLRTLHSLGGWPVLEPHTWDESSFDWLNLTAAALR - RYNNDVLIVWVGPDIKNSDENIVQDQTSGLPTRDYLLQPGNRKYL  
400 410 420 430 440 450 460 470 480 490  
380 390 400 410 420 430 440 450 460 470  
KAYHRYMTQIAILMGADKDKAAEELQRIVEFEVRLANATLPEADRHDTSAIYTKITLPELQRRVPQINWKEYLQTTLTGVALHPNESIVSYAMPYLVELG  
EAYRQFMLEVIGLLDVPADTARQATDEMIEFETQLANITSTPEERNNVSTLYRKMLDQLQEEVPQINWTHYL - TIVTERPVNGSSFVVMFAMSMDLV  
500 510 520 530 540 550 560 570 580 590  
480 490 500 510 520 530 540 550 560 570  
KILRDTDRRIVHNYAIWRLVMSIMTHMIDDYQKERVEFRRKLLGIQSERNRWSQCVEWTNKKLGMAVGALFIRDNFNQESKETALMTIHTIREAFNELLA  
ELIDQTEPRIVANYLLWRFVRRHINNLDRLGAKQRFNSALFGRERNPPRWKNCVQVNMGMMAVGAMFVRRYFDENSKRDTLMTHELQDAFREILG  
600 610 620 630 640 650 660 670 680 690  
580 590 600 610 620 630 640 650 660 670  
DIDWMDDETRAVAKEKADAMNERIGYPDILTNADELEKEYVNLTIHGGFLFENILSILKWEAERNLQLLRKVPDKNKWATEPAVVNAFYNPKNNDIVFPA  
RTGWIDMATRQLAEQKVNAMSLRIGYPDFILDPEQLSARYATLEIHPDRYFENTLNVLSHIRRTDQEKLGQPVNKTAWHTAPAVVNAYYSRNKNQIMFPA  
700 710 720 730 740 750 760 770 780 790  
680 690 700 710 720 730 740 750 760 770  
GILQPLFYSQNFPSLNYGGIGVIGHEITHGFDDKGRQFDKGNMQWNNATIKTFRERAQCIIDQYSRYKIDEVGLYMDGRMTQGENIADNGGLKQS  
GILQPPFYHRHLPAKAINYGGIGVIGHELTHGFDDKGRLFDRDGNLYRWWSRAIEEFHERAACLVQYGRYIAEVDVQLDGENTQGENIADNGGIKQA  
800 810 820 830 840 850 860 870 880 890  
780 790 800 810 820 830 840 850 860  
YRAYRKWVSQHGE --- PDLPGLNMTHDQLFFLNIAQIWCGRMPEDALTKIRSSVHSPGIIRVIGPLSNSRDFAEAYRCLPGSPMPVSKCSVW  
FLAYSKWLAQTDRRVLEAETLPGLNVTRTQLFFLNFAQIWCGRMPATRNKLTAVHSPGRFRVIGTLSNSEDFAREYHCVPVGTMPNPPGKCSVW  
900 910 920 930 940 950 960 970 980 990

38.AGAP005423-PA BR92L AGAP008816-PA 3R 35.593 3.63E-46

```

      10      20      30      40      50      60      70      80      90     100
MFLTRSEYDRGVNTFSPEGRLLQVEYAIIEAIKFGSTAIGISTPDGVVMAVEKRITSSSLIEPSKMEKIVEVDRHIGCATSGLMADSRLLDRARIEQNHW
      10      20      30      40      50      60      70      80      90
MSSRYDRAITVFSPDGHLQVEYAEAVRKGSTAIGVRGKDVVVLGVEKKSVAKLQEERTVRKICLLDHHVMAFAGLTADARVLINRAQVQCQSHK

      110     120     130     140     150     160     170     180     190
FVYNERSMVSESCAQAVSNVAIQFGDDTDSAMSRPFGVAILFAGIE-NGEPQLWHMDPSGTYIRFDAKAIGSGSEGAQNLQEYLLPTMTIKE--AINL
      10      20      30      40      50      60      70      80      90
LSEEDPVTLEYITRYIAELKQKH-----TQSNRRPFGISCLIGGFYDGVPHLYKTEPSGVYCEWKANATGRSAKTVREFLEEHYSPAAVSTEEGTITL
      100     110     120     130     140     150     160     170     180     190

      200     210     220     230     240
ALSTLKOVMEFKLNSTNVEVMTMPKELFRMFSEFEVFEYTNMS
      10      20      30      40      50      60      70      80      90
AIRALLEVVQS--GQKSLEVAVMRDEPMKMLDAQTIEEYVKKIELAKEEEAEKKKAKK
      200     210     220     230     240

```

39.AGAP006104-PA BR92L AGAP009128-PA 3R 37.5 1.09E-54

```

      10      20      30      40      50      60      70      80
MALDFAAGCLGGCAGVLVGFPFDTVKVHLOTN---HRNPLYRGTYDCFRKIVVREGVHGLYRGMSSPMAGVAVVNAIVFGVYG---NIORRT
      10      20      30      40      50      60      70      80      90     100
MSENKSPIKYFLSGGFGGICTVLAGHPLDTIKVRLQTMPLPAAGQAPLYAGTLDCAKKTIAREGFRGLYKMSAPITGVAPIFAVSFFGFLGKRLQQKT

      90      100     110     120     130     140     150     160     170     180
ANPDSLYSH-FLAGSAAGLAOSIVCSPMELIKTRLOLODNLPRAAERFSGPMDCTRAIWRREGYRGIFRGLGITAARDMPGFSSYFVAYEYMVRCVANPS
      10      20      30      40      50      60      70      80      90
PDEELNYTLFAAGAFSGIFTTTVMAPGERIKCLLQIQQG-GNSPQKYSGMVDCAKQLYAEGBMRSIYKGAFATLLRDVPASGMVFLTYEYIQRALAPKA
      110     120     130     140     150     160     170     180     190

      190     200     210     220     230     240     250     260     270
P-----FVILMAGGLAGTFESWL VTFPLDVVKSRLQADGISGKPOYNGLIDCVRKSHAAEGWAFLSRGLASTLLRAFPMAVCFLVVSYTMKLFDDP
      10      20      30      40      50      60      70      80      90
GEQKDASIGLLGTIFAGGMAGIANWAIIGMPADVLSRLQTAPEGTYP--NGIRDVFRELMRREGPLALYKGVTPVMLRAFPANAACFIVGEVFMKFLNVV
      200     210     220     230     240     250     260     270     280     290

      280     290     300     310     320     330
KVSSVVEELGATAATVETPLLIIVPTVVPOVPIATAPKLSVPAPAYNKRASHHDDSHLLS

APGL
300

```

40.AGAP000079-PA BR9X AGAP004718-PA 2L 35.043 1.56E-65

```

      10      20      30      40      50      60      70      80      90
MERKRSIRRRQKPPFAERAKDHCNFTAFMFSNVGIIFLVLVLYMAGAFMFIAIEGNEALERFAQIPFKRNETAMKLWQISCCEVNVFNKSVFE
      10      20      30      40      50      60      70      80      90
MIRQRSSVRSRGSSSTTISDPREKVKDCCKRFVAFMCTQVGVGGLIVAYALVGAASFMSIETQEPNPLIEHVVTLLRRNCAELWDVTE-QLNLFNSSIWH

      100     110     120     130     140     150     160     170     180     190
EKVGNEIRAYOEKIVLWARRGWOGSDITLSETPWFSFGAFLYSLTVITTIYGNIVPRTEWKGKIATIFYTTIGMPLFLLYLSNIGDILAKSFKWIYAKF
      10      20      30      40      50      60      70      80      90
YEADLVLKRYODDFAEAIIRRGYDGR---SPEEVWNFPAAALMFCLAVFTMIGYGNMVPRTAWGKATVIYATFGIPLYILYFMNMGKVLASTFKWLYTWF
      100     110     120     130     140     150     160     170     180     190

      200     210     220     230     240     250     260     270     280     290
CLCRVCPGVARRRAMRRARRRARTTEERDYSSEIGDNGFDTNTITTSNVDEEIEEIEITAETNTVTPITICIMIMIGYIFFGARLFADWENWDILDGSYFCF
      10      20      30      40      50      60      70      80      90
HECS-----HRSDGGLALEEGPGL-----APRKRIIVPTTACLWVITYIATGTIMFAEWKWTYLD SAYFCV
      200     210     220     230     240     250     260

      300     310     320     330     340     350     360     370
ISLSSIGFGDIVPGASL---QTKGDTKMEISFILCAVYLLGMALIAMCFNLMQEQVIYKIRSLKKCVRGCFRCAKAVPVPMEEPES
      10      20      30      40      50      60      70      80      90
TSLCKIGIGDLVPGANILDSQSGKPTKLVINF---VYMLLGMGLVAMCYILMREEVRIKMQEIKEIDTRLCLDLSSKFAKCCGTDKDSQYYD
      270     280     290     300     310     320     330     340

```



## The statistical note

1. Compute the p value for excess number. Based on the Figure 2a, the following code was executed in R environment.

```
excess <- matrix(c(2.44, 11.49, 2.07, 19.9,0), nrow = 2, byrow = T)
dimnames(excess) = list(c("ex", "ob"),c("xa", "aa","ax"))
chisq.test(excess, simulate.p.value = T, B = 1000000)
```

Note: The permutation test was designed firstly by Fisher, which is based on computationally intensive method to allow for any unclear distribution due to small sample size. The result is based on the approximation method of Monte Carlo simulation with `simulate.p.value = T`.

2. Compute p values for Table S3 (Baker and Papa's expression data) based on mean and standard error data from Vectorbase.

code: 1) design a function to compute summary test by using mean and standard errors:

```
t.test2 <- function(m1,m2,s1,s2,n1,n2,m0=0,equal.variance=FALSE)
{
  if( equal.variance==FALSE )
  {
    stderr <- sqrt( (s1^2/n1) + (s2^2/n2) )
    df <- ( (s1^2/n1 + s2^2/n2)^2 )/( (s1^2/n1)^2/(n1-1) + (s2^2/n2)^2/(n2-1) )
  } else
  {
    stderr <- sqrt( (1/n1 + 1/n2) * ((n1-1)*s1^2 + (n2-1)*s2^2)/(n1+n2-2) )
    df <- n1+n2-2
  }
  t <- (m1-m2-m0)/stderr
  res <- c(m1-m2, stderr, t, 2*pt(-abs(t),df))
  names(res) <- c("Difference of means", "Std Error", "t", "p-value")
  return(res)
}
```

2) input data and transfer standard error into standard deviations

For example,

```
x1=c(6.51,32.85,23.71,12.46,150.52,3.59,97.42,126.89,85.67,396.09,26.53,368.44,47.44,0.5
1,2.04,282.38,191.48,150.52,25.55,58.13,172.33,22.13,27.87,26.09,29.81,7.47,67.23,3.61,97
.14,19.74,10.38,7.51,38.88,4.81,0,3.59,70.57,3.65,3.7,26.53);
s1=c(0.74,9.34,7.85,2.68,15.84,1.3,9.11,7.55,9.69,44.25,4.01,46.89,2.21,0.13,0.43,27.50.82,
15.84,3.4,3.8,13.59,1.57,0.73,3.27,23.63,6.74,38.1,0.21,21.37,2.88,0.98,2.37,7.32,3.76,0,0.3
2,1.55,0.6,1.11,2.6)*sqrt(3);
x2=c(21.89,260.45,21.42,62.51,131.94,20.1,109.01,197.35,1159.71,539.81,90.79,1162.53,15
4.1,0.3,24.14,1504.47,156.24,131.94,394.14,143.34,302.74,180.07,66.38,77.94,21.81,24.13,
```

```
114.1,0.09,415.25,3.75,35.58,14.88,7.34,0.56,0,43.45,171.75,0.27,10.02,297.53);
s2=c(1.14,12.87,4.01,2.73,15.54,0.56,4.43,9.24,71.14,32.57,4.83,29.13,7.57,0.07,1.76,36.12,
5.93,15.54,14.33,3.97,15.13,24.42,3.46,6.1,14.49,17.3,87.35,0.09,10.74,0.44,2.96,2.49,6.16,
0.34,0,3.98,5.48,0.21,6.63,13.73)*sqrt(3);
```

3) compute the summary test for data

```
for(i in 1:length(x1)) {print(t.test2(x1[i], x2[i], s1[i], s2[i], 3, 3))}
```

### 3. Expression pattern across spermatogenesis stages

In R. I used the following code and changed very little for A>A type retrogene

```
a=read.table("sperm_rawexpr.txt",header=T)
df <- a %>%
  group_by(id, br,Branch,Pair,dr,gene, Stage) %>%
  summarise(mean = mean(log(Ex+1)),
            std = sd(log(Ex +1))/sqrt(3))
a1=as.data.frame(df)
b=subset(a1, dr == "X>A")
ggplot(b, aes(x= Stage, y= mean, group=id, color= gene)) +
  geom_line() +
  geom_point()+
  geom_errorbar(aes(ymin=mean-std, ymax=mean+std), width=1,
               position=position_dodge(0.05)) +facet_wrap(~Pair)
```

4. The test of gene enrichment based on KEGG and clusterProfiler. br17retrogene.txt is simply the gene-list including 19 retrogenes from BR1-7.

```
library(clusterProfiler)
a=read.table("br17retrogene.txt")
kk1 <- enrichKEGG(gene      = a$V1,
                  organism   = 'aga',
                  pvalueCutoff = 0.05)
head(kk1)
```
